# Supplementary material for: 1,3,2-Diazaborole-derived carbene complexes of boron
Source: Royal Society of Chemistry journal article supplement (doi:10.1039/c7dt04079b), 2017-11-16
Supplement: c7dt04079b1.pdf [file c7dt04079b1.pdf]

**SUPPORTING INFORMATION of SYNTHESSES, STRUCTURES,  
AND COMPUTATIONS**

**1,3,2-Diazaborole-Derived Carbene Complexes of Boron**

Hunter P. Hickox, Yuzhong Wang, Kaitlin M. Luedecke, Yaoming Xie, Pingrong Wei,  
Deidrah Carrillo, Nathaniel L. Dominique, Dongtao Cui, Henry F. Schaefer III, and  
Gregory H. Robinson\*

*Department of Chemistry and the Center for Computational Chemistry, The University of Georgia,  
Athens, Georgia 30602-2556, United States.*

To whom correspondence should be addressed. Email: [robinson@uga.edu](mailto:robinson@uga.edu)

## SUPPORTING INFORMATIONS of SYNTHESSES

### Materials and Methods

#### General.

The syntheses of air-sensitive compounds were performed under purified argon using Schlenk techniques and an inert atmosphere drybox (M-Braun LabMaster SP). Chemicals were purchased from Aldrich and Strem and used as received. The solvents were dried and distilled under argon from Na/benzophenone prior to use.  $^1\text{H}$  NMR,  $^{13}\text{C}\{^1\text{H}\}$  NMR, and  $^{11}\text{B}$  NMR spectra were recorded on a Bruker Avance III HD 400 MHz spectrometer and a Varian Unity Inova 500 MHz spectrometer. X-ray intensity data for **2**, **3**, and **4** were collected at room temperature on a Bruker D8 Quest PHOTON 100 CMOS X-ray diffractometer system with Incoatec Microfocus Source ( $I_{\mu\text{S}}$ ) monochromated Mo  $K\alpha$  radiation ( $\lambda = 0.71073 \text{ \AA}$ , sealed tube) using phi and omega-scan technique. Elemental analyses were performed by Complete Analytical Laboratories, Inc. (Highland Park, NJ).

Compound **2**: 8.9 mL of 1.0 M  $\text{BBr}_3$  (in hexanes, 8.90 mmol) solution was added to a Schlenk flask containing **1** (1.037 g, 2.22 mmol) in 25 mL of hexane at room temperature. The mixture was then stirred overnight, giving **2** in a quantitative yield with excess  $\text{BBr}_3$  (in terms of the  $^1\text{H}$  NMR data). X-ray quality crystals of **2** were observed after crystallization of **2** in the concentrated parent solution at  $-20 \text{ }^\circ\text{C}$  overnight. Mp: gradually decomposed ( $>144^\circ\text{C}$ ).  $^1\text{H}$  NMR (400.14 MHz,  $\text{CD}_2\text{Cl}_2$ ):  $\delta$  1.25-1.27 [multiple d,  $J = 4.0 \text{ Hz}$ , 12H,  $\text{CH}(\text{CH}_3)_2$ ], 1.34 [d,  $J = 4.0 \text{ Hz}$ , 6H,  $\text{CH}(\text{CH}_3)_2$ ], 1.41 [d,  $J = 4.0 \text{ Hz}$ , 6H,  $\text{CH}(\text{CH}_3)_2$ ], 2.69 [m,  $J = 8.0 \text{ Hz}$ , 2H,  $\text{CH}(\text{CH}_3)_2$ ], 2.83 [m,  $J = 8.0 \text{ Hz}$ , 2H,  $\text{CH}(\text{CH}_3)_2$ ], 5.82 [s, 2H, N- $\text{CH}_2$ ], 7.28-7.32 [multiple d,  $J = 8.0 \text{ Hz}$ , 4H, Ar- $H$ ], 7.44 [t,  $J = 8.0 \text{ Hz}$ , 1H, Ar- $H$ ], 7.51 [t,  $J = 8.0\text{Hz}$ , 1H, Ar- $H$ ].  $^{13}\text{C}\{^1\text{H}\}$  NMR (100.63 MHz,  $\text{CD}_2\text{Cl}_2$ ):  $\delta$  24.22, 24.64, 24.93, 24.99 [ $\text{CH}(\text{CH}_3)_2$ ], 29.69, 30.30 [ $\text{CH}(\text{CH}_3)_2$ ], 69.88 [ $\text{NCCH}_2$ ], 124.88, 125.17, 130.32, 131.19, 132.85, 133.91, 143.35, 145.79 [Ar-C], 132.61 [ $\text{NCCH}_2$ ].  $^{11}\text{B}$  NMR ( $\text{C}_6\text{D}_6$ , 160.35 MHz):  $\delta$  For **2**, +30.28 (NBN), -14.42 ( $\text{CBBr}_3$ ); For **1**, +20.10 (NBN); For free  $\text{BBr}_3$ , +37.14. Anal. (CALI, Highland Park, NJ) Calcd (found) for **2**: C 43.50 (43.48); H 5.06 (5.19); N 3.90 (3.82).

Compound **3**: 25 mL of hexane was added to a Schlenk flask containing **1** (1.000 g, 2.14 mmol) and  $\text{BI}_3$  (0.922 g, 2.35 mmol) at room temperature. The resulting mixture was stirred overnight, giving **3** in a quantitative yield with excess  $\text{BI}_3$  (in terms of the  $^1\text{H}$  NMR data). X-ray quality yellow crystals of **3** were observed after recrystallization of **3** in 1,2-difluorobenzene at  $-20 \text{ }^\circ\text{C}$  overnight. Mp:  $148.2^\circ\text{C}$ .  $^1\text{H}$  NMR (400.14 MHz,  $\text{CD}_2\text{Cl}_2$ ):  $\delta$  1.22-1.26 [multiple d,  $J = 8.0 \text{ Hz}$ , 12H,  $\text{CH}(\text{CH}_3)_2$ ], 1.31 [d,  $J = 8.0 \text{ Hz}$ , 6H,  $\text{CH}(\text{CH}_3)_2$ ], 1.45 [d,  $J = 8.0 \text{ Hz}$ , 6H,  $\text{CH}(\text{CH}_3)_2$ ], 2.72 [m,  $J = 8.0 \text{ Hz}$ , 2H,  $\text{CH}(\text{CH}_3)_2$ ],

2.88 [m,  $J = 8.0$  Hz, 2H,  $CH(CH_3)_2$ ], 6.42 [s, 2H, N- $CH_2$ ], 7.27-7.30 [multiple d,  $J = 8.0$  Hz, 4H, Ar- $H$ ], 7.42 [t,  $J = 8.0$  Hz, 1H, Ar- $H$ ], 7.51 [t,  $J = 8.0$  Hz, 1H, Ar- $H$ ].  $^{13}C\{^1H\}$  NMR (100.63 MHz,  $CD_2Cl_2$ ):  $\delta$  24.16, 24.66, 24.74, 24.76 [ $CH(CH_3)_2$ ], 29.60, 30.16 [ $CH(CH_3)_2$ ], 71.42 [NCCH $_2$ ], 125.00, 125.01, 130.12, 131.30, 133.69, 144.24, 145.83 [Ar-C], 132.52 [NCCH $_2$ ].  $^{11}B$  NMR ( $C_6D_6$ , 160.35 MHz):  $\delta$  For **3**, +30.42 (NBN), -69.52 [ $CBI_3$ ]; For free  $BI_3$ , -8.07; For **1**, +20.21 (NBN); For the unknown species, +25.26, -45.60. Anal. (CALI, Highland Park, NJ) Calcd (found) for **3**: C 36.36 (35.80); H 4.23 (4.25); N 3.26 (3.07).

## SUPPORTING INFORMATIONS of COMPUTATIONS

All computations employed the Gaussian09 programs:

For Gaussian 09: M. J. Frisch, G. W. Trucks, H. B. Schlegel, G. E. Scuseria, M. A. Robb, J. R. Cheeseman, G. Scalmani, V. Barone, B. Mennucci, G. A. Petersson, H. Nakatsuji, M. Caricato, X. Li, H. P. Hratchian, A. F. Izmaylov, J. Bloino, G. Zheng, J. L. Sonnenberg, M. Hada, M. Ehara, K. Toyota, R. Fukuda, J. Hasegawa, M. Ishida, T. Nakajima, Y. Honda, O. Kitao, H. Nakai, T. Vreven, J. A. Montgomery, Jr., J. E. Peralta, F. Ogliaro, M. Bearpark, J. J. Heyd, E. Brothers, K. N. Kudin, V. N. Staroverov, T. Keith, R. Kobayashi, J. Normand, K. Raghavachari, A. Rendell, J. C. Burant, S. S. Iyengar, J. Tomasi, M. Cossi, N. Rega, J. M. Millam, M. Klene, J. E. Knox, J. B. Cross, V. Bakken, C. Adamo, J. Jaramillo, R. Gomperts, R. E. Stratmann, O. Yazyev, A. J. Austin, R. Cammi, C. Pomelli, J. W. Ochterski, R. L. Martin, K. Morokuma, V. G. Zakrzewski, G. A. Voth, P. Salvador, J. J. Dannenberg, S. Dapprich, A. D. Daniels, O. Farkas, J. B. Foresman, J. V. Ortiz, J. Cioslowski, and D. J. Fox, *Gaussian 09*, revision D.01; Gaussian, Inc., Wallingford CT, 2013.

**Table S1.** Coordinates of the B3LYP/6-311G\*\* optimized geometry of **2-Me**.

| Center<br>Number | Atomic<br>Number | Atomic<br>Type | Coordinates (Angstroms) |           |           |
|------------------|------------------|----------------|-------------------------|-----------|-----------|
|                  |                  |                | X                       | Y         | Z         |
| 1                | 5                | 0              | 2.442683                | 0.273251  | -0.010674 |
| 2                | 5                | 0              | -1.442053               | -0.016639 | -0.007940 |
| 3                | 35               | 0              | 4.192891                | -0.515245 | -0.007055 |
| 4                | 35               | 0              | -1.834886               | -1.213335 | -1.613118 |
| 5                | 35               | 0              | -1.818714               | -0.923223 | 1.792698  |
| 6                | 35               | 0              | -2.534205               | 1.699781  | -0.147301 |
| 7                | 7                | 0              | 1.162639                | -0.503284 | -0.000372 |
| 8                | 7                | 0              | 2.108349                | 1.615066  | -0.024540 |
| 9                | 6                | 0              | 0.135209                | 0.323441  | -0.014482 |
| 10               | 6                | 0              | 0.657872                | 1.727460  | -0.032018 |
| 11               | 1                | 0              | 0.268938                | 2.274820  | 0.835093  |
| 12               | 1                | 0              | 0.278336                | 2.247592  | -0.919682 |
| 13               | 6                | 0              | 2.932841                | 2.811668  | -0.036160 |
| 14               | 1                | 0              | 3.983600                | 2.526119  | -0.031638 |
| 15               | 1                | 0              | 2.734892                | 3.409096  | -0.930934 |
| 16               | 1                | 0              | 2.732419                | 3.427837  | 0.845218  |
| 17               | 6                | 0              | 1.070128                | -1.971035 | 0.009370  |
| 18               | 1                | 0              | 0.248408                | -2.280902 | 0.650316  |
| 19               | 1                | 0              | 0.887567                | -2.328469 | -1.004089 |
| 20               | 1                | 0              | 2.011467                | -2.370079 | 0.380064  |

**Table S2.** Coordinates of the B3LYP/6-311G\*\* optimized geometry of **3-Me**.

| Center<br>Number | Atomic<br>Number | Atomic<br>Type | Coordinates (Angstroms) |           |           |
|------------------|------------------|----------------|-------------------------|-----------|-----------|
|                  |                  |                | X                       | Y         | Z         |
| 1                | 5                | 0              | -2.935026               | -0.382629 | -0.043086 |
| 2                | 5                | 0              | 0.937885                | 0.004844  | -0.011654 |
| 3                | 35               | 0              | -4.709946               | 0.349665  | -0.026256 |
| 4                | 7                | 0              | -1.680426               | 0.431001  | -0.006363 |
| 5                | 7                | 0              | -2.562241               | -1.712679 | -0.092349 |
| 6                | 6                | 0              | -0.622218               | -0.364117 | -0.038075 |
| 7                | 6                | 0              | -1.110309               | -1.783216 | -0.098318 |
| 8                | 1                | 0              | -0.710372               | -2.347170 | 0.752883  |
| 9                | 1                | 0              | -0.717208               | -2.267767 | -1.000159 |
| 10               | 6                | 0              | -3.349953               | -2.932816 | -0.142166 |
| 11               | 1                | 0              | -4.408813               | -2.679190 | -0.133846 |
| 12               | 1                | 0              | -3.130844               | -3.497631 | -1.053057 |
| 13               | 1                | 0              | -3.133764               | -3.567979 | 0.721811  |
| 14               | 6                | 0              | -1.649206               | 1.898151  | 0.046583  |
| 15               | 1                | 0              | -0.863078               | 2.226946  | 0.722820  |
| 16               | 1                | 0              | -1.450400               | 2.294337  | -0.949637 |
| 17               | 1                | 0              | -2.616838               | 2.247409  | 0.398982  |
| 18               | 53               | 0              | 1.380963                | 1.399046  | -1.761993 |
| 19               | 53               | 0              | 1.318750                | 0.939367  | 2.049812  |
| 20               | 53               | 0              | 2.242814                | -1.860952 | -0.215824 |

## SUPPORTING INFORMATIONS of X-RAY

### Compound 2

**Table S3. Sample and crystal data for 2.**

|                               |                            |                     |
|-------------------------------|----------------------------|---------------------|
| <b>Identification code</b>    | <b>2</b>                   |                     |
| <b>Chemical formula</b>       | $C_{26}H_{36}B_2Br_4N_2$   |                     |
| <b>Formula weight</b>         | 717.82 g/mol               |                     |
| <b>Temperature</b>            | 297(2) K                   |                     |
| <b>Wavelength</b>             | 0.71073 Å                  |                     |
| <b>Crystal size</b>           | 0.250 x 0.260 x 0.450 mm   |                     |
| <b>Crystal system</b>         | orthorhombic               |                     |
| <b>Space group</b>            | Pbca (No. 61)              |                     |
| <b>Unit cell dimensions</b>   | a = 19.6037(12) Å          | $\alpha = 90^\circ$ |
|                               | b = 17.1792(11) Å          | $\beta = 90^\circ$  |
|                               | c = 37.549(2) Å            | $\gamma = 90^\circ$ |
| <b>Volume</b>                 | 12645.5(14) Å <sup>3</sup> |                     |
| <b>Z</b>                      | 16                         |                     |
| <b>Density (calculated)</b>   | 1.508 g/cm <sup>3</sup>    |                     |
| <b>Absorption coefficient</b> | 5.108 mm <sup>-1</sup>     |                     |
| <b>F(000)</b>                 | 5696                       |                     |

**Table S4. Data collection and structure refinement for 2.**

|                                            |                                                                                                                       |
|--------------------------------------------|-----------------------------------------------------------------------------------------------------------------------|
| <b>Theta range for data collection</b>     | 2.08 to 25.25°                                                                                                        |
| <b>Index ranges</b>                        | -22<=h<=23, -18<=k<=20, -45<=l<=45                                                                                    |
| <b>Reflections collected</b>               | 107342                                                                                                                |
| <b>Independent reflections</b>             | 11448 [R(int) = 0.1521]                                                                                               |
| <b>Coverage of independent reflections</b> | 99.9%                                                                                                                 |
| <b>Absorption correction</b>               | Multi-Scan                                                                                                            |
| <b>Max. and min. transmission</b>          | 0.7454 and 0.1543                                                                                                     |
| <b>Structure solution technique</b>        | direct methods                                                                                                        |
| <b>Structure solution program</b>          | SHELXS-97 (Sheldrick 2008)                                                                                            |
| <b>Refinement method</b>                   | Full-matrix least-squares on F <sup>2</sup>                                                                           |
| <b>Refinement program</b>                  | SHELXL-2014/7 (Sheldrick, 2014)                                                                                       |
| <b>Function minimized</b>                  | $\Sigma w(F_o^2 - F_c^2)^2$                                                                                           |
| <b>Data / restraints / parameters</b>      | 11448 / 4 / 625                                                                                                       |
| <b>Goodness-of-fit on F<sup>2</sup></b>    | 1.010                                                                                                                 |
| <b><math>\Delta/\sigma_{\max}</math></b>   | 0.001                                                                                                                 |
| <b>Final R indices</b>                     | 5934 data; I>2 $\sigma$ (I)      R1 = 0.0734, wR2 = 0.1574<br>all data                      R1 = 0.1618, wR2 = 0.1941 |
| <b>Weighting scheme</b>                    | $w=1/[\sigma^2(F_o^2)+(0.0744P)^2+51.2858P]$<br>where $P=(F_o^2+2F_c^2)/3$                                            |
| <b>Largest diff. peak and hole</b>         | 1.955 and -1.494 eÅ <sup>-3</sup>                                                                                     |
| <b>R.M.S. deviation from mean</b>          | 0.102 eÅ <sup>-3</sup>                                                                                                |



**Table S5. Bond lengths (Å) for 2.**

|          |           |          |           |
|----------|-----------|----------|-----------|
| B1-N2    | 1.359(10) | B1-N1    | 1.492(10) |
| B1-Br1   | 1.888(9)  | B2-C1    | 1.579(11) |
| B2-Br4   | 1.963(10) | B2-Br2   | 2.006(10) |
| B2-Br3   | 2.063(10) | N1-C1    | 1.325(9)  |
| N1-C15   | 1.466(9)  | N2-C3    | 1.448(9)  |
| N2-C2    | 1.445(9)  | C1-C2    | 1.493(10) |
| C2-H2A   | 0.98(2)   | C2-H2B   | 0.99(2)   |
| C3-C8    | 1.385(11) | C3-C4    | 1.403(11) |
| C4-C5    | 1.392(12) | C4-C12   | 1.497(12) |
| C5-C6    | 1.364(13) | C6-C7    | 1.352(13) |
| C7-C8    | 1.388(11) | C8-C9    | 1.505(11) |
| C9-C11   | 1.501(12) | C9-C10   | 1.529(12) |
| C12-C14  | 1.501(16) | C12-C13  | 1.544(15) |
| C15-C20  | 1.391(12) | C15-C16  | 1.394(12) |
| C16-C17  | 1.385(12) | C16-C24  | 1.489(12) |
| C17-C18  | 1.372(14) | C18-C19  | 1.359(15) |
| C19-C20  | 1.396(12) | C20-C21  | 1.497(13) |
| C21-C23  | 1.530(15) | C21-C22  | 1.524(14) |
| C24-C26  | 1.498(15) | C24-C25  | 1.508(15) |
| B3-N4    | 1.343(10) | B3-N3    | 1.488(11) |
| B3-Br5   | 1.894(9)  | B4-C27   | 1.600(12) |
| B4-Br6   | 1.987(11) | B4-Br8   | 1.995(11) |
| B4-Br7   | 2.058(14) | N3-C27   | 1.305(9)  |
| N3-C41   | 1.464(9)  | N4-C29   | 1.452(9)  |
| N4-C28   | 1.462(9)  | C27-C28  | 1.483(11) |
| C28-H28B | 0.98(2)   | C28-H28A | 0.99(2)   |
| C29-C30  | 1.373(11) | C29-C34  | 1.405(12) |
| C30-C31  | 1.381(12) | C30-C38  | 1.492(12) |
| C31-C32  | 1.367(15) | C32-C33  | 1.348(15) |
| C33-C34  | 1.385(12) | C34-C35  | 1.501(13) |
| C35-C36  | 1.515(14) | C35-C37  | 1.522(16) |
| C38-C40  | 1.524(14) | C38-C39  | 1.534(13) |
| C41-C46  | 1.378(12) | C41-C42  | 1.381(11) |
| C42-C43  | 1.395(12) | C42-C50  | 1.501(13) |

|         |           |         |           |
|---------|-----------|---------|-----------|
| C43-C44 | 1.360(15) | C44-C45 | 1.352(15) |
| C45-C46 | 1.385(13) | C46-C47 | 1.520(14) |
| C47-C49 | 1.538(16) | C47-C48 | 1.532(14) |
| C50-C51 | 1.535(14) | C50-C52 | 1.531(14) |

**Table S6. Bond angles (°) for 2.**

|             |           |             |           |
|-------------|-----------|-------------|-----------|
| N2-B1-N1    | 106.9(7)  | N2-B1-Br1   | 128.9(6)  |
| N1-B1-Br1   | 124.1(6)  | C1-B2-Br4   | 119.7(6)  |
| C1-B2-Br2   | 108.7(6)  | Br4-B2-Br2  | 110.4(5)  |
| C1-B2-Br3   | 99.8(6)   | Br4-B2-Br3  | 109.0(4)  |
| Br2-B2-Br3  | 108.5(5)  | C1-N1-C15   | 126.2(6)  |
| C1-N1-B1    | 110.4(6)  | C15-N1-B1   | 123.3(6)  |
| B1-N2-C3    | 131.5(6)  | B1-N2-C2    | 109.1(6)  |
| C3-N2-C2    | 119.3(6)  | N1-C1-C2    | 107.1(6)  |
| N1-C1-B2    | 131.7(7)  | C2-C1-B2    | 121.1(7)  |
| H2A-C2-H2B  | 101(6)    | H2A-C2-N2   | 113(4)    |
| H2B-C2-N2   | 115(4)    | H2A-C2-C1   | 111(4)    |
| H2B-C2-C1   | 112(4)    | N2-C2-C1    | 106.3(6)  |
| C8-C3-C4    | 123.3(7)  | C8-C3-N2    | 118.6(7)  |
| C4-C3-N2    | 118.1(7)  | C5-C4-C3    | 115.5(8)  |
| C5-C4-C12   | 121.9(9)  | C3-C4-C12   | 122.5(7)  |
| C6-C5-C4    | 122.6(9)  | C7-C6-C5    | 119.5(9)  |
| C6-C7-C8    | 122.3(9)  | C7-C8-C3    | 116.8(8)  |
| C7-C8-C9    | 120.5(8)  | C3-C8-C9    | 122.7(7)  |
| C11-C9-C8   | 112.9(8)  | C11-C9-C10  | 111.3(9)  |
| C8-C9-C10   | 112.9(7)  | C14-C12-C4  | 111.7(9)  |
| C14-C12-C13 | 111.2(11) | C4-C12-C13  | 110.8(10) |
| C20-C15-C16 | 124.7(7)  | C20-C15-N1  | 118.5(7)  |
| C16-C15-N1  | 116.6(7)  | C17-C16-C15 | 115.7(9)  |
| C17-C16-C24 | 120.1(9)  | C15-C16-C24 | 124.2(7)  |
| C18-C17-C16 | 121.4(9)  | C19-C18-C17 | 121.2(9)  |
| C18-C19-C20 | 121.0(10) | C19-C20-C15 | 116.0(9)  |
| C19-C20-C21 | 119.9(9)  | C15-C20-C21 | 124.1(8)  |
| C20-C21-C23 | 111.7(10) | C20-C21-C22 | 112.9(9)  |
| C23-C21-C22 | 108.8(9)  | C16-C24-C26 | 113.4(9)  |
| C16-C24-C25 | 113.5(9)  | C26-C24-C25 | 107.6(10) |
| N4-B3-N3    | 108.1(7)  | N4-B3-Br5   | 128.8(7)  |
| N3-B3-Br5   | 123.2(6)  | C27-B4-Br6  | 117.8(7)  |
| C27-B4-Br8  | 108.7(7)  | Br6-B4-Br8  | 109.8(6)  |

|               |           |              |           |
|---------------|-----------|--------------|-----------|
| C27-B4-Br7    | 100.7(7)  | Br6-B4-Br7   | 110.8(6)  |
| Br8-B4-Br7    | 108.5(5)  | C27-N3-C41   | 126.8(6)  |
| C27-N3-B3     | 109.6(6)  | C41-N3-B3    | 123.3(6)  |
| B3-N4-C29     | 132.0(6)  | B3-N4-C28    | 108.3(6)  |
| C29-N4-C28    | 119.4(6)  | N3-C27-C28   | 108.4(6)  |
| N3-C27-B4     | 132.2(7)  | C28-C27-B4   | 119.3(7)  |
| H28B-C28-H28A | 104(6)    | H28B-C28-N4  | 106(4)    |
| H28A-C28-N4   | 114(4)    | H28B-C28-C27 | 112(4)    |
| H28A-C28-C27  | 116.(4)   | N4-C28-C27   | 105.4(6)  |
| C30-C29-C34   | 123.3(8)  | C30-C29-N4   | 119.2(8)  |
| C34-C29-N4    | 117.4(7)  | C31-C30-C29  | 117.1(9)  |
| C31-C30-C38   | 120.6(9)  | C29-C30-C38  | 122.3(8)  |
| C30-C31-C32   | 121.1(10) | C33-C32-C31  | 120.8(9)  |
| C32-C33-C34   | 121.5(10) | C33-C34-C29  | 116.1(9)  |
| C33-C34-C35   | 120.4(9)  | C29-C34-C35  | 123.5(8)  |
| C34-C35-C36   | 111.2(9)  | C34-C35-C37  | 113.1(9)  |
| C36-C35-C37   | 109.9(11) | C30-C38-C40  | 112.0(9)  |
| C30-C38-C39   | 112.2(8)  | C40-C38-C39  | 108.7(9)  |
| C46-C41-C42   | 123.1(8)  | C46-C41-N3   | 115.7(8)  |
| C42-C41-N3    | 120.9(8)  | C43-C42-C41  | 117.3(9)  |
| C43-C42-C50   | 120.1(9)  | C41-C42-C50  | 122.7(8)  |
| C44-C43-C42   | 120.3(10) | C45-C44-C43  | 121.1(10) |
| C44-C45-C46   | 121.3(11) | C45-C46-C41  | 116.9(10) |
| C45-C46-C47   | 120.0(10) | C41-C46-C47  | 123.0(8)  |
| C46-C47-C49   | 111.6(9)  | C46-C47-C48  | 113.2(11) |
| C49-C47-C48   | 112.0(11) | C42-C50-C51  | 110.5(9)  |
| C42-C50-C52   | 112.7(9)  | C51-C50-C52  | 110.1(9)  |

### Compound 3

**Table S7. Sample and crystal data for 3.**

|                               |                                                              |                     |
|-------------------------------|--------------------------------------------------------------|---------------------|
| <b>Identification code</b>    | <b>3</b>                                                     |                     |
| <b>Chemical formula</b>       | $\text{C}_{26}\text{H}_{36}\text{B}_2\text{BrI}_3\text{N}_2$ |                     |
| <b>Formula weight</b>         | 858.80 g/mol                                                 |                     |
| <b>Temperature</b>            | 297(2) K                                                     |                     |
| <b>Wavelength</b>             | 0.71073 Å                                                    |                     |
| <b>Crystal size</b>           | 0.150 x 0.210 x 0.400 mm                                     |                     |
| <b>Crystal system</b>         | orthorhombic                                                 |                     |
| <b>Space group</b>            | P2 <sub>1</sub> 2 <sub>1</sub> 2 <sub>1</sub> (No. 19)       |                     |
| <b>Unit cell dimensions</b>   | a = 12.2369(6) Å                                             | $\alpha = 90^\circ$ |
|                               | b = 14.6825(7) Å                                             | $\beta = 90^\circ$  |
|                               | c = 18.0610(8) Å                                             | $\gamma = 90^\circ$ |
| <b>Volume</b>                 | 3245.0(3) Å <sup>3</sup>                                     |                     |
| <b>Z</b>                      | 4                                                            |                     |
| <b>Density (calculated)</b>   | 1.758 g/cm <sup>3</sup>                                      |                     |
| <b>Absorption coefficient</b> | 4.137 mm <sup>-1</sup>                                       |                     |
| <b>F(000)</b>                 | 1640                                                         |                     |

**Table S8. Data collection and structure refinement for 3.**

|                                          |                                                                                                          |
|------------------------------------------|----------------------------------------------------------------------------------------------------------|
| <b>Theta range for data collection</b>   | 2.01 to 27.88°                                                                                           |
| <b>Index ranges</b>                      | -16<=h<=16, -19<=k<=19, -23<=l<=23                                                                       |
| <b>Reflections collected</b>             | 104369                                                                                                   |
| <b>Independent reflections</b>           | 7743 [R(int) = 0.0503]                                                                                   |
| <b>Max. and min. transmission</b>        | 0.7457 and 0.2577                                                                                        |
| <b>Structure solution technique</b>      | direct methods                                                                                           |
| <b>Structure solution program</b>        | SHELXS-97 (Sheldrick 2008)                                                                               |
| <b>Refinement method</b>                 | Full-matrix least-squares on F <sup>2</sup>                                                              |
| <b>Refinement program</b>                | SHELXL-2014/7 (Sheldrick, 2014)                                                                          |
| <b>Function minimized</b>                | $\Sigma w(F_o^2 - F_c^2)^2$                                                                              |
| <b>Data / restraints / parameters</b>    | 7743 / 0 / 308                                                                                           |
| <b>Goodness-of-fit on F<sup>2</sup></b>  | 1.072                                                                                                    |
| <b><math>\Delta/\sigma_{\max}</math></b> | 0.001                                                                                                    |
| <b>Final R indices</b>                   | 6716 data;<br>I>2 $\sigma$ (I)      R1 = 0.0378, wR2 = 0.0925<br>all data      R1 = 0.0471, wR2 = 0.0982 |
| <b>Weighting scheme</b>                  | $w=1/[\sigma^2(F_o^2)+(0.0485P)^2+3.1668P]$<br>where $P=(F_o^2+2F_c^2)/3$                                |
| <b>Absolute structure parameter</b>      | 0.052(17)                                                                                                |
| <b>Largest diff. peak and hole</b>       | 0.851 and -1.603 eÅ <sup>-3</sup>                                                                        |
| <b>R.M.S. deviation from mean</b>        | 0.142 eÅ <sup>-3</sup>                                                                                   |

**Table S9. Bond lengths (Å) for 3.**

|         |           |         |           |
|---------|-----------|---------|-----------|
| B1-N2   | 1.342(8)  | B1-N1   | 1.503(7)  |
| B1-Br1  | 1.899(6)  | B2-C1   | 1.615(9)  |
| B2-I1   | 2.200(8)  | B2-I2   | 2.229(8)  |
| B2-I3   | 2.265(8)  | N1-C1   | 1.311(8)  |
| N1-C15  | 1.446(7)  | N2-C3   | 1.443(7)  |
| N2-C2   | 1.461(8)  | C1-C2   | 1.491(8)  |
| C3-C8   | 1.382(9)  | C3-C4   | 1.406(10) |
| C4-C5   | 1.373(10) | C4-C12  | 1.536(11) |
| C5-C6   | 1.359(12) | C6-C7   | 1.369(12) |
| C7-C8   | 1.391(8)  | C8-C9   | 1.513(10) |
| C9-C11  | 1.524(13) | C9-C10  | 1.493(13) |
| C12-C13 | 1.503(15) | C12-C14 | 1.526(14) |
| C15-C16 | 1.395(8)  | C15-C20 | 1.404(8)  |
| C16-C17 | 1.387(10) | C16-C24 | 1.512(11) |
| C17-C18 | 1.378(13) | C18-C19 | 1.358(12) |
| C19-C20 | 1.372(10) | C20-C21 | 1.519(10) |
| C21-C22 | 1.509(13) | C21-C23 | 1.532(13) |
| C24-C26 | 1.522(17) | C24-C25 | 1.56(2)   |

**Table S10. Bond angles (°) for 3.**

|             |           |             |           |
|-------------|-----------|-------------|-----------|
| N2-B1-N1    | 107.7(5)  | N2-B1-Br1   | 128.7(4)  |
| N1-B1-Br1   | 123.6(4)  | C1-B2-I1    | 120.7(5)  |
| C1-B2-I2    | 105.1(5)  | I1-B2-I2    | 108.5(3)  |
| C1-B2-I3    | 103.4(4)  | I1-B2-I3    | 108.2(3)  |
| I2-B2-I3    | 110.7(3)  | C1-N1-C15   | 128.3(5)  |
| C1-N1-B1    | 109.4(5)  | C15-N1-B1   | 122.2(5)  |
| B1-N2-C3    | 131.8(5)  | B1-N2-C2    | 109.0(5)  |
| C3-N2-C2    | 119.2(5)  | N1-C1-C2    | 108.4(5)  |
| N1-C1-B2    | 131.7(5)  | C2-C1-B2    | 119.9(5)  |
| N2-C2-C1    | 105.3(5)  | C8-C3-C4    | 122.4(5)  |
| C8-C3-N2    | 119.1(5)  | C4-C3-N2    | 118.5(5)  |
| C5-C4-C3    | 117.2(6)  | C5-C4-C12   | 121.0(7)  |
| C3-C4-C12   | 121.8(6)  | C6-C5-C4    | 121.9(7)  |
| C5-C6-C7    | 119.8(7)  | C8-C7-C6    | 121.7(7)  |
| C3-C8-C7    | 116.9(6)  | C3-C8-C9    | 123.8(5)  |
| C7-C8-C9    | 119.3(6)  | C8-C9-C11   | 111.2(6)  |
| C8-C9-C10   | 112.7(7)  | C11-C9-C10  | 109.0(9)  |
| C4-C12-C13  | 110.6(7)  | C4-C12-C14  | 111.2(8)  |
| C13-C12-C14 | 112.6(10) | C16-C15-C20 | 123.5(6)  |
| C16-C15-N1  | 118.2(5)  | C20-C15-N1  | 118.1(5)  |
| C17-C16-C15 | 116.4(6)  | C17-C16-C24 | 120.7(7)  |
| C15-C16-C24 | 122.9(6)  | C18-C17-C16 | 121.1(7)  |
| C19-C18-C17 | 120.4(7)  | C20-C19-C18 | 122.3(7)  |
| C19-C20-C15 | 116.2(6)  | C19-C20-C21 | 121.2(6)  |
| C15-C20-C21 | 122.5(6)  | C22-C21-C20 | 113.3(8)  |
| C22-C21-C23 | 109.7(8)  | C20-C21-C23 | 110.3(6)  |
| C16-C24-C26 | 111.0(9)  | C16-C24-C25 | 108.1(11) |
| C26-C24-C25 | 111.2(10) |             |           |



## Compound 4

**Table S11. Sample and crystal data for 4.**

|                               |                                                                                                                          |
|-------------------------------|--------------------------------------------------------------------------------------------------------------------------|
| <b>Identification code</b>    | <b>4</b>                                                                                                                 |
| <b>Chemical formula</b>       | $C_{26}H_{37}B_2Br_5N_2$                                                                                                 |
| <b>Formula weight</b>         | 798.74 g/mol                                                                                                             |
| <b>Temperature</b>            | 100(2) K                                                                                                                 |
| <b>Wavelength</b>             | 0.71073 Å                                                                                                                |
| <b>Crystal size</b>           | 0.180 x 0.300 x 0.400 mm                                                                                                 |
| <b>Crystal system</b>         | monoclinic                                                                                                               |
| <b>Space group</b>            | P2 <sub>1</sub> /c (No. 14)                                                                                              |
| <b>Unit cell dimensions</b>   | a = 12.317(2) Å $\alpha = 90^\circ$<br>b = 22.811(5) Å $\beta = 109.718(6)^\circ$<br>c = 14.606(3) Å $\gamma = 90^\circ$ |
| <b>Volume</b>                 | 3863.3(13) Å <sup>3</sup>                                                                                                |
| <b>Z</b>                      | 4                                                                                                                        |
| <b>Density (calculated)</b>   | 1.373 g/cm <sup>3</sup>                                                                                                  |
| <b>Absorption coefficient</b> | 5.216 mm <sup>-1</sup>                                                                                                   |
| <b>F(000)</b>                 | 1568                                                                                                                     |

**Table S12. Data collection and structure refinement for 4.**

|                                            |                                                                                                |
|--------------------------------------------|------------------------------------------------------------------------------------------------|
| <b>Theta range for data collection</b>     | 2.08 to 26.02°                                                                                 |
| <b>Index ranges</b>                        | -15<=h<=15, -28<=k<=28, -18<=l<=18                                                             |
| <b>Reflections collected</b>               | 118311                                                                                         |
| <b>Independent reflections</b>             | 7600 [R(int) = 0.0999]                                                                         |
| <b>Coverage of independent reflections</b> | 99.9%                                                                                          |
| <b>Absorption correction</b>               | Multi-Scan                                                                                     |
| <b>Max. and min. transmission</b>          | 0.7454 and 0.2455                                                                              |
| <b>Structure solution technique</b>        | direct methods                                                                                 |
| <b>Structure solution program</b>          | SHELXS-97 (Sheldrick 2008)                                                                     |
| <b>Refinement method</b>                   | Full-matrix least-squares on F <sup>2</sup>                                                    |
| <b>Refinement program</b>                  | SHELXL-2014/7 (Sheldrick, 2014)                                                                |
| <b>Function minimized</b>                  | $\Sigma w(F_o^2 - F_c^2)^2$                                                                    |
| <b>Data / restraints / parameters</b>      | 7600 / 3 / 329                                                                                 |
| <b>Goodness-of-fit on F<sup>2</sup></b>    | 1.023                                                                                          |
| <b><math>\Delta/\sigma_{\max}</math></b>   | 0.001                                                                                          |
| <b>Final R indices</b>                     | 6114 data; R1 = 0.0390, wR2 = 0.0836<br>I>2 $\sigma$ (I)<br>all data R1 = 0.0534, wR2 = 0.0884 |
| <b>Weighting scheme</b>                    | $w=1/[\sigma^2(F_o^2)+(0.0332P)^2+7.0875P]$<br>where $P=(F_o^2+2F_c^2)/3$                      |
| <b>Largest diff. peak and hole</b>         | 0.960 and -0.950 eÅ <sup>-3</sup>                                                              |
| <b>R.M.S. deviation from mean</b>          | 0.089 eÅ <sup>-3</sup>                                                                         |

**Table S13. Bond lengths (Å) for 4.**

|         |           |         |           |
|---------|-----------|---------|-----------|
| B1-N1   | 1.403(5)  | B1-N2   | 1.475(5)  |
| B1-Br1  | 1.882(4)  | B2-Br5  | 2.003(4)  |
| B2-Br4  | 2.017(4)  | B2-Br3  | 2.007(4)  |
| B2-Br2  | 2.024(4)  | N1-C1   | 1.419(4)  |
| N1-C15  | 1.450(4)  | N2-C2   | 1.344(4)  |
| N2-C3   | 1.460(4)  | C1-H1A  | 0.974(19) |
| C1-H1B  | 0.996(19) | C1-C2   | 1.470(5)  |
| C2-H2   | 0.946(19) | C3-C4   | 1.393(5)  |
| C3-C8   | 1.400(5)  | C4-C5   | 1.399(5)  |
| C4-C12  | 1.510(6)  | C5-C6   | 1.369(6)  |
| C6-C7   | 1.384(6)  | C7-C8   | 1.389(5)  |
| C8-C9   | 1.520(6)  | C9-C10  | 1.523(5)  |
| C9-C11  | 1.534(6)  | C12-C14 | 1.540(6)  |
| C12-C13 | 1.526(6)  | C15-C16 | 1.406(5)  |
| C15-C20 | 1.392(5)  | C16-C17 | 1.385(6)  |
| C16-C24 | 1.536(6)  | C17-C18 | 1.368(6)  |
| C18-C19 | 1.377(6)  | C19-C20 | 1.396(5)  |
| C20-C21 | 1.511(5)  | C21-C23 | 1.519(6)  |
| C21-C22 | 1.545(6)  | C24-C26 | 1.531(7)  |
| C24-C25 | 1.540(8)  |         |           |

**Table S14. Bond angles (°) for 4.**

|             |            |             |            |
|-------------|------------|-------------|------------|
| N1-B1-N2    | 106.0(3)   | N1-B1-Br1   | 128.0(3)   |
| N2-B1-Br1   | 126.0(3)   | Br5-B2-Br4  | 110.1(2)   |
| Br5-B2-Br3  | 110.75(19) | Br4-B2-Br3  | 109.3(2)   |
| Br5-B2-Br2  | 107.95(19) | Br4-B2-Br2  | 109.23(19) |
| Br3-B2-Br2  | 109.4(2)   | B1-N1-C1    | 110.1(3)   |
| B1-N1-C15   | 129.1(3)   | C1-N1-C15   | 120.8(3)   |
| C2-N2-C3    | 123.3(3)   | C2-N2-B1    | 108.8(3)   |
| C3-N2-B1    | 127.9(3)   | H1A-C1-H1B  | 89(4)      |
| H1A-C1-N1   | 121(3)     | H1B-C1-N1   | 114(3)     |
| H1A-C1-C2   | 115(3)     | H1B-C1-C2   | 111(3)     |
| N1-C1-C2    | 105.4(3)   | H2-C2-N2    | 117(3)     |
| H2-C2-C1    | 133.(3)    | N2-C2-C1    | 109.5(3)   |
| C4-C3-C8    | 124.3(3)   | C4-C3-N2    | 117.9(3)   |
| C8-C3-N2    | 117.8(3)   | C5-C4-C3    | 116.6(4)   |
| C5-C4-C12   | 120.2(4)   | C3-C4-C12   | 123.3(3)   |
| C6-C5-C4    | 120.7(4)   | C5-C6-C7    | 121.1(4)   |
| C6-C7-C8    | 121.1(4)   | C3-C8-C7    | 116.2(4)   |
| C3-C8-C9    | 122.9(3)   | C7-C8-C9    | 120.9(4)   |
| C10-C9-C8   | 112.9(3)   | C10-C9-C11  | 110.2(4)   |
| C8-C9-C11   | 110.8(3)   | C14-C12-C4  | 110.4(4)   |
| C14-C12-C13 | 110.3(3)   | C4-C12-C13  | 111.5(3)   |
| C16-C15-C20 | 123.1(3)   | C16-C15-N1  | 118.4(3)   |
| C20-C15-N1  | 118.5(3)   | C15-C16-C17 | 117.1(4)   |
| C15-C16-C24 | 122.4(3)   | C17-C16-C24 | 120.4(4)   |
| C18-C17-C16 | 121.3(4)   | C17-C18-C19 | 120.5(4)   |
| C20-C19-C18 | 121.3(4)   | C19-C20-C15 | 116.7(3)   |
| C19-C20-C21 | 120.1(3)   | C15-C20-C21 | 123.2(3)   |
| C23-C21-C20 | 111.7(4)   | C23-C21-C22 | 111.0(3)   |
| C20-C21-C22 | 110.3(3)   | C16-C24-C26 | 110.2(4)   |
| C16-C24-C25 | 110.7(4)   | C26-C24-C25 | 111.3(4)   |
